# Supplementary material
Source: PubMed Central journal article supplement (PMC2941539)

Frozen stocks

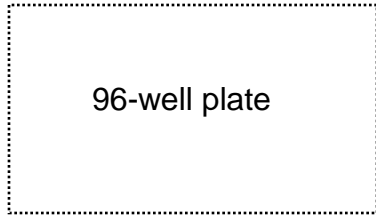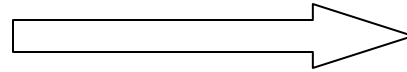

Overnight cultures

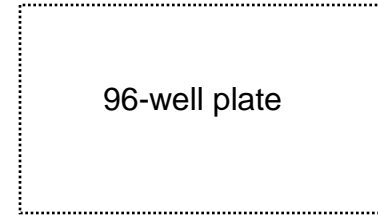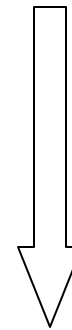

Survival cultures

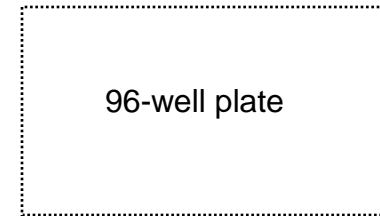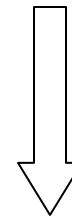

Measure OD after 5 hours, growth rates

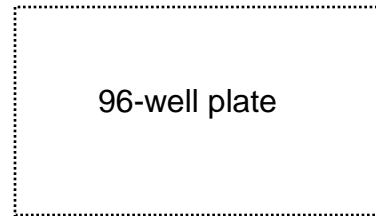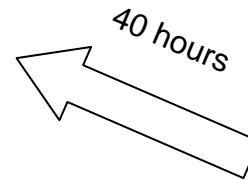

Regrowth cultures

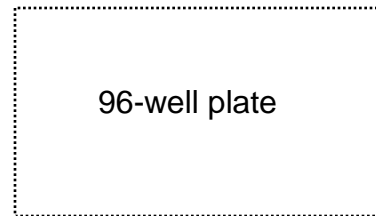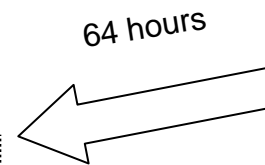

Measure OD after 5 hours, age-dependent regrowth rates

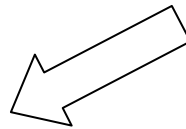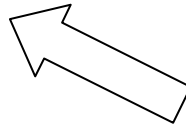

Supplement: NIHMS226667-supplement-Supp_Fig_S1.pdf [file NIHMS226667-supplement-Supp_Fig_S1.pdf]
